# Supplementary material for: Machine learning for patient risk stratification for acute respiratory distress syndrome
Source: PLoS One. 2019 Mar 28;14(3):e0214465. doi: 10.1371/journal.pone.0214465 (PMC6438573; doi:10.1371/journal.pone.0214465)
Supplement: S1 Model Features — (XLSX) [file pone.0214465.s008.xlsx]

## Sheet: features.txt
Feature	2.5% Coefficient Weight	Median Feature Weight	97.5% Feature Weight
lactate_flag_missing	-0.188375	-0.120124	-0.0511015
pH_flag_missing	-0.188375	-0.120124	-0.0511015
location_Missing	-0.201918	-0.11915	-0.0316709
ageinyears_(47.0,58.0]_b2_t5	-0.169059	-0.112897	-0.048934
HCO2_flag_n	-0.186461	-0.11163	-0.0339764
sp02_std_(0.570315277343,1.34771159029]_b2_t5	-0.15353	-0.104868	-0.0564239
hr_min_(65.0,74.0]_b2_t5	-0.149253	-0.100052	-0.0522459
hr_max_(48.0,80.0]_b1_t5	-0.141765	-0.0996471	-0.0571324
sp02_mean_(98.3333333333,100.0]_b5_t5	-0.132391	-0.0981964	-0.0641664
hr_mean_(82.5384615385,91.5]_b3_t5	-0.147447	-0.0981357	-0.0555403
hr_median_(72.5,82.0]_b2_t5	-0.143043	-0.0960714	-0.057053
Alb_flag_hh	-0.161742	-0.0941147	-0.0323837
rr_median_(9.0,16.0]_b1_t5	-0.144686	-0.0929318	-0.0492707
hr_mean_(73.0,82.5384615385]_b2_t5	-0.136525	-0.0910618	-0.0532428
sp02_iqr_(0.0,0.5]_b1_t5	-0.138174	-0.0909805	-0.0470113
dbp_min_(57.0,63.0]_b3_t5	-0.142963	-0.0906329	-0.0360233
sp02_mean_(95.0,96.6]_b3_t5	-0.147928	-0.089776	-0.0273034
dbp_std_(6.5,9.58908844906]_b4_t5	-0.152344	-0.0893057	-0.0289151
rr_max_(10.0,18.0]_b1_t5	-0.15922	-0.0877171	-0.0232562
trop_flag_missing	-0.16584	-0.0870052	-0.00986111
hr_min_(74.0,83.0]_b3_t5	-0.147821	-0.0847945	-0.0247651
pf_calc_median_(229.0,283.0]_b4_t5	-0.132814	-0.0839316	-0.0279659
pf_calc_iqr_(0.0,12.5]_b1_t4	-0.159172	-0.0836486	-0.0081245
rr_mean_(9.33333333333,16.0]_b1_t5	-0.12604	-0.0827521	-0.0438542
sbp_max_(167.0,300.0]_b5_t5	-0.152228	-0.0822915	-0.0137453
Plt_count_(0.0,1.0]_b1_t2	-0.125806	-0.0820139	-0.0315819
sbp_mean_(133.0,146.666666667]_b4_t5	-0.135666	-0.0819608	-0.0301838
pf_calc_mean_(230.625,275.5]_b4_t5	-0.12863	-0.0811939	-0.0309653
dbp_median_(58.0,64.0]_b2_t5	-0.133011	-0.0805389	-0.0270609
lactate_count_(0.0,1.0]_b1_t3	-0.144188	-0.0803442	-0.0257441
Cr_count_(0.0,1.0]_b1_t2	-0.12377	-0.079682	-0.0293558
WBC_count_(1.0,3.0]_b1_t1	-0.12377	-0.079682	-0.0293558
rr_std_(1.0,2.16624137482]_b2_t4	-0.134701	-0.0774627	-0.0302986
sbp_iqr_(12.25,19.0]_b4_t5	-0.158301	-0.07726	-0.011388
sbp_min_(121.0,135.0]_b4_t5	-0.142197	-0.0763595	-0.0124787
sp02_std_(0.0,0.570315277343]_b1_t5	-0.11949	-0.0762494	-0.0353186
rr_min_(0.0,14.0]_b1_t4	-0.1318	-0.0759993	-0.0245718
sp02_max_(99.0,100.0]_b4_t4	-0.150445	-0.0752074	-0.00144797
pf_calc_missing	-0.114348	-0.0749593	-0.0359223
oriented	-0.140726	-0.0715432	-0.000405114
sp02_min_(94.0,96.0]_b4_t5	-0.11631	-0.0713504	-0.0289071
hr_max_(80.0,90.0]_b2_t5	-0.122255	-0.0711408	-0.0267945
urine_out_mean_(90.0,200.0]_b3_t4	-0.120956	-0.0702925	-0.0277725
hr_median_(82.0,91.0]_b3_t5	-0.123403	-0.0699394	-0.0165073
pf_missing	-0.121026	-0.0698097	-0.0180299
TP_flag_ll	-0.113301	-0.0696311	-0.019792
rr_mean_(16.0,17.6666666667]_b2_t5	-0.11564	-0.0680054	-0.0175695
pf_calc_max_(273.0,341.0]_b4_t5	-0.132592	-0.0679574	-0.00438766
Na_flag_n	-0.145688	-0.0657854	0.00708722
DE650	-0.0898429	-0.0651682	-0.0406598
AST_flag_l	-0.118872	-0.064808	-0.00596504
gcs_eye_median_(1.0,3.0]_b1_t2	-0.0958252	-0.0645396	-0.0348113
BL110	-0.149679	-0.0645163	0.0158991
sp02_median_(97.0,99.0]_b4_t5	-0.131617	-0.0639955	-0.00459607
iv_in_median_(162.8,2004.17]_b3_t3	-0.125909	-0.0639527	-0.00751217
rr_min_(14.0,16.0]_b2_t4	-0.142193	-0.0631461	0.0187061
WBC_flag_missing	-0.105752	-0.0627753	-0.0119368
Plt_flag_ll	-0.105752	-0.0627753	-0.0119368
dbp_mean_(58.5,65.0]_b2_t5	-0.131023	-0.0619996	0.00476555
fi02_std_(0.0,3.91918358845]_b1_t4	-0.151848	-0.0616796	0.0259756
sbp_std_(7.31816613337,10.874878196]_b3_t5	-0.128486	-0.0614197	0.00595508
sp02_min_(96.0,100.0]_b5_t5	-0.0995406	-0.0602892	-0.0216793
urine_out_max_(400.0,2650.0]_b4_t4	-0.105133	-0.0600372	-0.00882807
iv_in_total_(0.0,35.0900001]_b1_t3	-0.10728	-0.0600035	-0.0122407
Hgb_flag_h	-0.128083	-0.0593421	0.016418
Cr_flag_n	-0.14133	-0.0588991	0.0191492
hr_std_(6.04611904907,9.71387538524]_b4_t5	-0.125524	-0.0586854	0.0099783
temp_iqr_(0.45,3.9]_b3_t3	-0.113721	-0.0586187	-0.00483783
gcs_eye_mean_(1.0,3.0]_b1_t2	-0.0901071	-0.0585153	-0.0277805
pCO2_flag_missing	-0.108673	-0.0582482	-0.00515026
pO2_flag_missing	-0.108673	-0.0582482	-0.00515026
CN204	-0.106689	-0.0572442	-0.0172542
iv_in_max_(0.0,50.0]_b1_t4	-0.107322	-0.0569539	-0.0105493
PTT_flag_ll	-0.117769	-0.0568712	-0.00227576
hr_std_(3.90423559171,6.04611904907]_b3_t5	-0.12618	-0.056364	0.0201566
PTT_flag_missing	-0.129579	-0.0560081	0.0214297
INR_count_(1.0,3.0]_b2_t2	-0.0977798	-0.0549523	0.000125353
GA900	-0.105119	-0.0548319	-0.00848834
temp_mean_(97.7,98.05]_b2_t5	-0.117306	-0.0547189	0.00243662
pf_calc_median_(199.0,229.0]_b3_t5	-0.114471	-0.0542787	0.000743876
dbp_median_(70.5,78.0]_b4_t5	-0.112545	-0.0524903	0.0113778
CV702	-0.0838539	-0.0514922	-0.0147558
sbp_median_(146.0,221.0]_b5_t5	-0.11701	-0.051453	0.00285096
dbp_min_(51.0,57.0]_b2_t5	-0.130542	-0.0512258	0.0251633
Plt_flag_h	-0.128325	-0.0511472	0.0222911
rr_median_(16.0,18.0]_b2_t5	-0.129266	-0.0506855	0.0178922
sp02_median_(99.0,100.0]_b5_t5	-0.0910253	-0.049405	-0.0094372
pf_calc_min_(193.0,239.0]_b4_t5	-0.111134	-0.0491868	0.00457001
sp02_min_(92.0,94.0]_b3_t5	-0.119522	-0.0489469	0.0160398
rr_iqr_(0.0,1.0]_b1_t4	-0.128893	-0.0489274	0.0212486
CV350	-0.0649317	-0.0488654	-0.0358902
BUN_flag_n	-0.129734	-0.0486059	0.0232255
TP_flag_h	-0.114834	-0.0481686	0.0198056
gcs_eye_max_(1.0,3.0]_b1_t2	-0.0814715	-0.0477605	-0.0162661
gcs_eye_min_(1.0,3.0]_b1_t2	-0.0899367	-0.0473218	-0.00721547
ageinyears_(65.0,74.0]_b4_t5	-0.12763	-0.0473017	0.0311521
lipase_flag_l	-0.112303	-0.0470086	0.0231509
RRobs_min_(23.0,52.0]_b4_t4	-0.0608646	-0.0466594	-0.0322645
HS501	-0.0818779	-0.0460983	-0.0126167
sbp_median_(133.0,146.0]_b4_t5	-0.104089	-0.0456877	0.0187719
AST_flag_hh	-0.114862	-0.0455067	0.0194447
dbp_max_(91.0,183.0]_b5_t5	-0.114808	-0.0454491	0.018856
BUN_count_(0.0,1.0]_b1_t3	-0.077039	-0.0453504	-0.0147658
RRobs_median_(25.8,52.0]_b5_t5	-0.0594353	-0.0448891	-0.0313924
RRobs_mean_(25.0,52.0]_b5_t5	-0.059423	-0.0448783	-0.0309426
iv_in_total_(35.0900001,543.33]_b2_t3	-0.110182	-0.0447488	0.0140965
rass_mean_(-1.0,0.0]_b3_t4	-0.087103	-0.0446594	-0.0073559
AM115	-0.0566603	-0.0439262	-0.0318553
rass_max_(-1.0,0.0]_b3_t4	-0.0858975	-0.0439168	-0.00449808
dbp_max_(81.0,91.0]_b4_t5	-0.113913	-0.043875	0.0278824
noninvasive	-0.10182	-0.0437483	0.0166987
rass_std_(0.0,2.86138078556]_b1_t1	-0.0941871	-0.0436643	0.00593821
rass_iqr_(0.0,4.5]_b1_t1	-0.0941871	-0.0436643	0.00593821
rass_median_(-1.0,0.0]_b3_t4	-0.0860814	-0.0435864	-0.00592154
CN101	-0.133319	-0.0435551	0.0386151
iv_in_iqr_(0.0,47.55]_b1_t3	-0.100893	-0.0433792	0.0155384
rass_mean_(-3.0,-1.0]_b2_t4	-0.0584222	-0.0426573	-0.0289337
trop_flag_n	-0.0960744	-0.0425236	0.0130746
pf_calc_min_(161.0,193.0]_b3_t5	-0.123864	-0.0422648	0.0333789
rass_min_(-3.0,-1.0]_b2_t4	-0.0578077	-0.0421928	-0.0288025
pf_calc_std_(0.0,12.5]_b1_t4	-0.11956	-0.042084	0.0322592
Vtobs_iqr_(55.6,477.0]_b4_t4	-0.0581378	-0.0419561	-0.0263856
CN103	-0.118287	-0.0416508	0.0362786
temp_missing	-0.0705658	-0.0414551	-0.0134443
dbp_iqr_(7.0,11.5]_b4_t5	-0.109624	-0.0410944	0.0180822
location_floor	-0.109422	-0.0402547	0.0305283
K_count_(0.0,1.0]_b1_t2	-0.0711802	-0.0401881	-0.0103164
Na_count_(0.0,1.0]_b1_t2	-0.0708262	-0.0400091	-0.00999732
HCO2_count_(0.0,1.0]_b1_t2	-0.0708262	-0.0400091	-0.00999732
BUN_count_(2.0,3.0]_b3_t3	-0.0708262	-0.0400091	-0.00999732
fi02_median_(36.0,40.0]_b3_t5	-0.0837118	-0.0398282	0.004885
Vtobs_iqr_(0.0,5.0]_b1_t4	-0.0813327	-0.0397429	-0.00333618
Vtobs_min_(298.8,391.6]_b2_t5	-0.0543696	-0.0395591	-0.0257069
Vtobs_mean_(120.0,386.6]_b1_t5	-0.0543312	-0.0394432	-0.0259157
rr_iqr_(2.0,4.35]_b3_t4	-0.117221	-0.0394349	0.0283925
alert	-0.116062	-0.0393461	0.0415609
Vtobs_std_(0.0,6.51152144312]_b1_t4	-0.0810446	-0.039252	-0.00229225
Vtobs_median_(120.0,391.0]_b1_t5	-0.0535784	-0.0391946	-0.0264306
fi02_max_(21.0,36.0]_b1_t5	-0.114882	-0.0391293	0.0382444
rass_median_(-3.0,-1.0]_b2_t4	-0.052796	-0.0390878	-0.0260864
MS101	-0.0675845	-0.0387094	-0.0122271
urine_out_max_(100.0,250.0]_b2_t4	-0.0899213	-0.0385387	0.0145158
RRobs_mean_(19.8892156863,25.0]_b4_t5	-0.0530585	-0.0382349	-0.0250127
hr_iqr_(4.0,7.0]_b3_t5	-0.106998	-0.0379871	0.0284134
temp_min_(97.5,97.9]_b2_t5	-0.11577	-0.0375842	0.0319749
RRobs_max_(19.0,23.0]_b3_t5	-0.0533792	-0.037426	-0.0237589
urine_out_min_(34.0,1825.0]_b2_t2	-0.0846014	-0.0373599	0.00385787
gcs_verbal_max_(4.0,5.0]_b2_t2	-0.0939612	-0.0370377	0.0155718
sbp_mean_(146.666666667,215.0]_b5_t5	-0.109526	-0.036445	0.0214779
rass_min_(-1.0,0.0]_b3_t4	-0.0787188	-0.0356397	0.00384232
sbp_iqr_(8.0,12.25]_b3_t5	-0.106885	-0.0355664	0.0440476
rass_max_(-3.0,-1.0]_b2_t4	-0.0493679	-0.0354653	-0.023238
INR_flag_l	-0.0893017	-0.0351369	0.0215146
HS051	-0.0946092	-0.0349255	0.0181461
Alb_flag_l	-0.0893017	-0.0348455	0.0215203
Vtobs_max_(120.0,412.8]_b1_t5	-0.0487199	-0.0347928	-0.0229713
urine_out_total_(75.0,400.0]_b2_t3	-0.108568	-0.0345717	0.0317906
racename_Other	-0.0560559	-0.0345235	-0.0106107
temp_max_(99.1,105.6]_b5_t5	-0.0989853	-0.0344083	0.0280536
fi02_iqr_(8.0,19.5]_b3_t4	-0.099225	-0.0340155	0.0268553
Tbili_flag_ll	-0.0885235	-0.0337427	0.0244647
Tbili_flag_h	-0.105199	-0.0331142	0.0387311
fi02_min_(40.0,100.0]_b3_t3	-0.0947391	-0.0325792	0.0292867
dbp_mean_(78.1666666667,120.0]_b5_t5	-0.0958392	-0.0324361	0.0253964
BNP_count_(0.0,1.0]_b1_t2	-0.0587984	-0.0323606	-0.0100339
Vtset_median_(200.0,400.0]_b1_t4	-0.0464423	-0.0321998	-0.0193102
pCO2_flag_l	-0.0724541	-0.0321889	0.0152356
K_flag_n	-0.109331	-0.0320395	0.0483329
K_flag_h	-0.0853843	-0.0320138	0.0163375
AU100	-0.066078	-0.0317433	0.00334861
PEEP_median_(5.0,8.0]_b2_t3	-0.0460658	-0.0314154	-0.0188658
pH_flag_h	-0.0851476	-0.0311211	0.0217889
gcs_motor_mean_(1.0,5.38666666667]_b1_t2	-0.0658415	-0.0308891	0.00283365
TN460	-0.080557	-0.0307833	0.0201065
rr_iqr_(1.0,2.0]_b2_t4	-0.108707	-0.0291484	0.0457841
mAirP_mean_(12.0,24.0909090909]_b5_t5	-0.0421208	-0.0289741	-0.0154616
sp02_iqr_(0.5,1.25]_b2_t5	-0.0995564	-0.0282257	0.0367607
CN900	-0.0619267	-0.0278841	0.012816
iv_in_missing	-0.0576156	-0.0277782	-0.00371959
urine_out_missing	-0.0576156	-0.0277782	-0.00371959
rbc_transf_missing	-0.0576156	-0.0277782	-0.00371959
ffp_transf_missing	-0.0576156	-0.0277782	-0.00371959
mAirP_max_(5.0,8.1]_b1_t5	-0.0418318	-0.0276514	-0.0149178
OP103	-0.039688	-0.0276481	-0.0176585
Vtset_max_(200.0,400.0]_b1_t4	-0.0392294	-0.0273809	-0.016177
Vtset_mean_(200.0,400.0]_b1_t4	-0.0392294	-0.0273809	-0.016177
fi02_iqr_(0.0,2.0]_b1_t4	-0.109304	-0.027275	0.0485107
gcs_motor_max_(1.0,6.0]_b1_t1	-0.0548882	-0.0272151	-0.00028034
gcs_motor_std_(0.0,2.5]_b1_t1	-0.0548882	-0.0272151	-0.00028034
gcs_motor_iqr_(0.0,5.0]_b1_t1	-0.0548882	-0.0272151	-0.00028034
gcs_eye_std_(0.0,1.5]_b1_t1	-0.0548882	-0.0272151	-0.00028034
gcs_eye_iqr_(0.0,2.0]_b1_t1	-0.0548882	-0.0272151	-0.00028034
RRobs_median_(20.0,25.8]_b4_t5	-0.040148	-0.0271186	-0.0169154
mAirP_median_(5.0,7.9]_b1_t5	-0.0402552	-0.0271075	-0.0149285
RRobs_min_(18.0,23.0]_b3_t4	-0.0379688	-0.0269722	-0.0169616
iv_in_mean_(0.0,19.6480001333]_b1_t4	-0.083204	-0.0269203	0.0247432
mAirP_min_(0.0,7.5]_b1_t5	-0.0403023	-0.0262501	-0.0150351
pf_mean_(155.454548,218.657895]_b2_t5	-0.0529637	-0.0261791	1.45527e-05
pf_median_(155.393944,218.657895]_b2_t5	-0.0529637	-0.0261791	1.45527e-05
sp02_iqr_(1.25,2.0]_b3_t5	-0.106356	-0.0261444	0.0524286
pf_calc_min_(239.0,393.0]_b5_t5	-0.0778671	-0.0259082	0.0227573
iv_in_iqr_(47.55,187.5]_b2_t3	-0.0847636	-0.0253903	0.0308621
RRset_max_(14.0,16.0]_b2_t4	-0.0498324	-0.0253492	0.0019501
vasso_missing	-0.0468036	-0.0251743	-0.00218401
iv_in_std_(0.0,50.0]_b1_t3	-0.0856627	-0.0247776	0.0331168
CV490	-0.0363705	-0.0247625	-0.0168162
norepi_missing	-0.0558013	-0.0246839	0.00715568
WBC_flag_n	-0.106266	-0.0246738	0.058175
mAirP_max_(14.0,31.0]_b5_t5	-0.0363167	-0.0241044	-0.0123452
pf_calc_mean_(201.333333333,230.625]_b3_t5	-0.104392	-0.0240507	0.0465656
hr_min_(0.0,65.0]_b1_t5	-0.0917471	-0.0240068	0.0420752
gcs_motor_min_(1.0,5.0]_b1_t2	-0.0642137	-0.0237919	0.0149593
PTT_count_(0.0,1.0]_b1_t2	-0.0491468	-0.0237871	0.00513195
dbp_std_(4.29469957558,6.5]_b3_t5	-0.0973133	-0.023748	0.0498164
Vtobs_std_(79.7896537606,445.950942432]_b4_t4	-0.0500844	-0.023734	0.00216076
mAirP_mean_(5.0,7.855]_b1_t5	-0.0361915	-0.0234907	-0.013334
gcs_verbal_std_(0.0,2.0]_b1_t1	-0.0518592	-0.0233679	0.00342616
gcs_verbal_iqr_(0.0,4.0]_b1_t1	-0.0518592	-0.0233679	0.00342616
RRset_mean_(16.0,18.0]_b3_t4	-0.0342644	-0.0230998	-0.0120964
OP210	-0.0909151	-0.0230658	0.0458516
pCO2_count_(1.0,7.0]_b2_t2	-0.0319308	-0.023064	-0.0155864
pO2_count_(0.0,1.0]_b1_t2	-0.0319308	-0.023064	-0.0155864
trop_count_(0.0,1.0]_b1_t2	-0.0319308	-0.023064	-0.0155864
BNP_count_(1.0,2.0]_b2_t2	-0.0319308	-0.023064	-0.0155864
mil_missing	-0.0319308	-0.023064	-0.0155864
plt_transf_missing	-0.0319308	-0.023064	-0.0155864
gcs_verbal_median_(4.0,5.0]_b2_t2	-0.07945	-0.022776	0.0326381
TN420	-0.0669475	-0.0226484	0.0199818
pO2_flag_h	-0.0778043	-0.0225965	0.0325624
Plat_median_(22.0,33.0]_b5_t5	-0.0346317	-0.0223404	-0.0120242
PEEP_std_(0.0,4.93006648592]_b1_t1	-0.060612	-0.0222099	0.00929234
PEEP_iqr_(0.0,10.0]_b1_t1	-0.060612	-0.0222099	0.00929234
DE101	-0.0689908	-0.0222063	0.0177968
Plat_std_(0.0,0.5]_b1_t2	-0.0640048	-0.0220656	0.022925
Vtobs_min_(0.0,298.8]_b1_t5	-0.0481016	-0.0220366	0.00454523
urine_out_std_(56.2086838108,132.230069175]_b2_t3	-0.0888523	-0.0220017	0.0375358
RRset_std_(0.0,1.3251402119]_b1_t2	-0.0674278	-0.021818	0.0237793
GA208	-0.0343847	-0.0217758	-0.0112457
fi02_median_(52.0,100.0]_b5_t5	-0.0838673	-0.0214058	0.041072
iv_in_min_(5.47799998,2004.17]_b2_t2	-0.0780771	-0.0213591	0.0322594
RRset_median_(16.0,18.0]_b3_t4	-0.0318214	-0.0212665	-0.0108936
hr_iqr_(7.0,12.0]_b4_t5	-0.0978623	-0.0212003	0.0515641
Plat_mean_(22.0,32.5]_b5_t5	-0.0325077	-0.021138	-0.0111271
PEEP_max_(5.0,8.0]_b2_t3	-0.0415148	-0.0210221	0.0024331
pH_count_(1.0,2.0]_b2_t3	-0.0695597	-0.0208912	0.0249599
pCO2_count_(0.0,1.0]_b1_t2	-0.0695597	-0.0208912	0.0249599
Plat_min_(21.0,32.0]_b5_t5	-0.0325982	-0.0206297	-0.011351
temp_median_(97.7,98.1]_b2_t5	-0.0995632	-0.0206119	0.0474481
invasive	-0.0547816	-0.0205443	0.00977488
Plat_iqr_(0.0,0.5]_b1_t2	-0.0626787	-0.0204647	0.0245388
dbp_max_(32.0,64.0]_b1_t5	-0.0919581	-0.0202862	0.0523262
racename_Asian	-0.0298331	-0.0201622	-0.0117485
RRset_min_(14.0,16.0]_b3_t4	-0.0433623	-0.0201088	0.00560485
dobu_missing	-0.0293708	-0.01992	-0.0108756
mAirP_min_(11.0,22.0]_b5_t5	-0.0306742	-0.0196975	-0.0105459
sp02_std_(1.34771159029,1.94999208609]_b3_t5	-0.0962075	-0.0196749	0.0562438
RRobs_max_(28.0,56.0]_b5_t5	-0.0476331	-0.0188769	0.00419394
Hgb_flag_hh	-0.0294954	-0.0187241	-0.00998182
Plat_max_(17.0,19.0]_b3_t5	-0.0311683	-0.0186631	-0.00947036
Alb_count_(0.0,1.0]_b1_t2	-0.0517469	-0.0186341	0.00949497
RRobs_max_(23.0,28.0]_b4_t5	-0.053227	-0.0182783	0.0128631
phenyl_missing	-0.0278468	-0.0176365	-0.00804545
PEEP_max_(4.0,5.0]_b1_t3	-0.0667253	-0.0175558	0.019157
PEEP_mean_(4.0,5.0]_b1_t3	-0.0667253	-0.0175558	0.019157
sbp_median_(122.0,133.0]_b3_t5	-0.0891267	-0.0172231	0.0456414
VT509	-0.0266617	-0.0171702	-0.00950731
Vtset_missing	-0.0478828	-0.0170638	0.0149758
dopa_missing	-0.0279441	-0.0170519	-0.00618661
OP300	-0.0631059	-0.0170342	0.0233397
fi02_max_(95.0,100.0]_b5_t5	-0.0559632	-0.0169546	0.0199573
RRobs_std_(1.0,3.06317103732]_b2_t3	-0.0446381	-0.0169039	0.0103965
CN709	-0.0259511	-0.0168759	-0.00962016
pf_min_(131.060608,199.444446]_b2_t5	-0.0490836	-0.0168722	0.0179181
gcs_verbal_min_(1.0,2.0]_b1_t2	-0.0546196	-0.0168238	0.018187
PEEP_median_(4.0,5.0]_b1_t3	-0.0624921	-0.0162651	0.0215602
fi02_std_(7.98435971134,17.7270979012]_b3_t4	-0.100543	-0.0162425	0.0582221
temp_min_(97.9,98.1]_b3_t5	-0.0860711	-0.0160026	0.035411
gcs_verbal_mean_(1.0,3.53333333333]_b1_t2	-0.0536214	-0.0158792	0.0193069
temp_max_(91.0,97.9]_b1_t5	-0.0859009	-0.0157812	0.0456346
pf_max_(156.9624,238.928576]_b2_t5	-0.0515775	-0.0157	0.0163387
IM600	-0.0243068	-0.0156952	-0.00927628
RRset_min_(16.0,44.0]_b4_t4	-0.0332452	-0.0156664	0.00365234
RRset_missing	-0.0495544	-0.0155725	0.0192099
sbp_iqr_(4.0,8.0]_b2_t5	-0.0924471	-0.0155712	0.0543331
Plat_max_(19.0,22.0]_b4_t5	-0.0252496	-0.0155538	-0.00743469
Plat_min_(0.0,14.0]_b1_t5	-0.0385382	-0.0152282	0.00859405
sp02_max_(80.0,96.0]_b1_t4	-0.0862987	-0.0151039	0.0547592
RRobs_iqr_(3.0,14.5]_b3_t3	-0.0468387	-0.0150267	0.0141169
sbp_max_(136.0,148.0]_b3_t5	-0.097105	-0.0149928	0.0656762
Tbili_count_(0.0,1.0]_b1_t2	-0.0482409	-0.0149457	0.0132646
AU300	-0.0243387	-0.0147143	-0.00751643
norepi_iqr_(0.0,0.0250000004]_b1_t4	-0.0289719	-0.0146577	-0.000422292
GA303	-0.0233064	-0.0146422	-0.00800711
fi02_mean_(40.4,52.0]_b4_t5	-0.087059	-0.0146115	0.0591905
epi_missing	-0.0264132	-0.014582	-0.00346626
RRobs_iqr_(0.5,3.0]_b2_t3	-0.0436327	-0.0145381	0.0111014
AM300	-0.02195	-0.0144563	-0.0085524
AST_count_(0.0,1.0]_b1_t2	-0.04766	-0.0144159	0.0137957
AH105	-0.0238819	-0.0142616	-0.0059888
fi02_max_(52.0,95.0]_b4_t5	-0.0835084	-0.0140342	0.0515988
lactate_flag_n	-0.096878	-0.0139884	0.0697983
pf_calc_median_(283.0,393.0]_b5_t5	-0.0701544	-0.0137991	0.0371645
sbp_max_(148.0,167.0]_b4_t5	-0.0902935	-0.0136286	0.0565308
gcs_motor_median_(5.5,6.0]_b2_t2	-0.0531327	-0.0135949	0.0249509
OT200	-0.0212538	-0.0135907	-0.00781836
INR_count_(0.0,1.0]_b1_t2	-0.0452556	-0.0131606	0.0148495
pH_flag_l	-0.0813578	-0.0130352	0.0459263
RRobs_std_(0.0,1.0]_b1_t3	-0.0679881	-0.012966	0.0417571
pf_calc_mean_(275.5,393.0]_b5_t5	-0.067595	-0.0128849	0.0392784
sbp_std_(16.2888765727,85.5]_b5_t5	-0.0852648	-0.0127498	0.050179
CV300	-0.0684086	-0.0125627	0.0305363
gcs_motor_median_(1.0,5.5]_b1_t2	-0.0551419	-0.0125316	0.0269445
RRobs_median_(14.0,16.0]_b2_t5	-0.0410713	-0.01253	0.0142879
RS900	-0.0286919	-0.0123766	0.00565417
racename_Caucasian	-0.0911514	-0.0123518	0.0661523
DX900	-0.0206298	-0.0123255	-0.00510611
OR900	-0.0581391	-0.0122839	0.0284088
PEEP_min_(3.0,5.0]_b1_t2	-0.0521773	-0.012262	0.0209715
hr_iqr_(0.0,2.0]_b1_t5	-0.0946103	-0.0122114	0.0582977
BL117	-0.0195284	-0.0121154	-0.00606453
AM650	-0.0202597	-0.0119613	-0.00557735
sbp_missing	-0.0192226	-0.0117826	-0.00626844
dbp_missing	-0.0192226	-0.0117826	-0.00626844
pf_calc_max_(229.0,273.0]_b3_t5	-0.0760576	-0.0113237	0.0531611
HCO2_flag_h	-0.0601216	-0.0112306	0.0362729
hr_mean_(47.0,73.0]_b1_t5	-0.0768867	-0.0111917	0.0494417
mAirP_max_(8.1,9.14]_b2_t5	-0.0365366	-0.011167	0.0129851
mAirP_std_(0.0,0.5]_b1_t3	-0.0563406	-0.0111112	0.0280511
urine_out_median_(1.0,200.0]_b2_t3	-0.0815372	-0.011088	0.0568618
Vtobs_mean_(487.063157895,528.756666667]_b4_t5	-0.0422488	-0.0109703	0.0152277
CN400	-0.0615404	-0.0109033	0.0348502
mAirP_iqr_(0.0,0.315]_b1_t3	-0.0569393	-0.0105293	0.0284227
Vtset_min_(200.0,400.0]_b1_t4	-0.0428769	-0.0104547	0.0167806
RE109	-0.0168239	-0.0103416	-0.0053262
AST_count_(1.0,2.0]_b2_t2	-0.0373316	-0.010303	0.0192896
mAirP_std_(1.40053558623,6.54573652591]_b3_t3	-0.0355036	-0.0101754	0.0121306
norepi_std_(0.108430917258,1.12853887837]_b4_t4	-0.0194732	-0.0101521	-0.00368471
location_ICU	-0.0189589	-0.0101496	-0.00372076
mAirP_median_(9.76,12.0]_b4_t5	-0.0407929	-0.0100733	0.0179663
Vtset_min_(400.0,450.0]_b2_t4	-0.0371054	-0.0100358	0.0176197
urine_out_iqr_(0.0,15.0]_b1_t3	-0.0768996	-0.0100222	0.0629557
temp_mean_(98.8,103.066666667]_b5_t5	-0.0748174	-0.00999365	0.0487107
norepi_max_(0.40000001,3.0]_b5_t5	-0.0189585	-0.0099632	-0.00334312
sbp_std_(10.874878196,16.2888765727]_b4_t5	-0.0860761	-0.0099326	0.0617489
norepi_mean_(0.2000000012,2.22]_b5_t5	-0.0184293	-0.00993043	-0.00349133
MS200	-0.0162274	-0.00988174	-0.00456015
Cr_flag_l	-0.0709099	-0.00975127	0.0460803
sbp_mean_(122.25,133.0]_b3_t5	-0.0881371	-0.00971363	0.060767
AM200	-0.0742495	-0.00966291	0.0525498
vasso_std_(0.0,0.0146070154458]_b1_t2	-0.0187982	-0.00954235	-0.00354326
vasso_iqr_(0.0,0.0179999992]_b1_t2	-0.0187982	-0.00954235	-0.00354326
TP_flag_hh	-0.017498	-0.00950014	-0.00336071
RRset_mean_(18.0,44.0]_b4_t4	-0.0253019	-0.00943671	0.00887072
CV800	-0.0162005	-0.00940119	-0.00510142
CV150	-0.0156841	-0.00931488	-0.00454157
CN609	-0.0410619	-0.00925931	0.019134
OT109	-0.0163407	-0.00909758	-0.00319544
Alb_count_(1.0,2.0]_b2_t2	-0.0361906	-0.00900637	0.0204447
hr_median_(46.0,72.5]_b1_t5	-0.0760308	-0.00895866	0.0536761
GU900	-0.0646847	-0.00884389	0.0337014
Vtobs_std_(29.0281664944,79.7896537606]_b3_t4	-0.039865	-0.00883863	0.023244
norepi_median_(0.2,3.0]_b5_t5	-0.0169356	-0.00868817	-0.00261735
norepi_iqr_(0.0535,0.1108000036]_b3_t4	-0.0171675	-0.00864379	-0.00264325
pf_min_(199.444446,277.555554]_b3_t5	-0.0405749	-0.00861225	0.0262522
Plat_mean_(14.0,16.0]_b2_t5	-0.0255878	-0.00859449	0.014129
Plat_median_(0.0,14.0]_b1_t5	-0.0307569	-0.00851704	0.0149462
TP_count_(1.0,2.0]_b2_t2	-0.0348764	-0.00840543	0.0218443
mAirP_iqr_(1.4,10.5]_b3_t3	-0.0332879	-0.00824876	0.0130611
urine_out_std_(132.230069175,1139.47356266]_b3_t3	-0.0622769	-0.00820885	0.0471553
Vtobs_median_(485.0,527.4]_b4_t5	-0.0389919	-0.0081067	0.0182129
RRset_iqr_(0.0,15.0]_b1_t1	-0.0429884	-0.00804947	0.0272039
GA605	-0.0746361	-0.00804799	0.0547923
fi02_min_(32.0,40.0]_b2_t3	-0.0819801	-0.00799943	0.0637869
TN475	-0.0249831	-0.00793492	0.0106372
Plat_median_(14.0,16.0]_b2_t5	-0.0249544	-0.0078572	0.0146658
RRset_median_(18.0,44.0]_b4_t4	-0.0235417	-0.00775803	0.0103292
Vtobs_iqr_(19.2,55.6]_b3_t4	-0.0385665	-0.00774703	0.0180793
Plat_mean_(0.0,14.0]_b1_t5	-0.0303473	-0.00747454	0.0155605
iv_in_std_(50.0,229.082008]_b2_t3	-0.0632126	-0.00733343	0.0443704
gcs_verbal_mean_(3.53333333333,5.0]_b2_t2	-0.0495419	-0.00728907	0.0290253
RRset_max_(20.0,44.0]_b4_t4	-0.0231144	-0.00728727	0.0115254
rr_missing	-0.0137284	-0.00703706	-0.00279214
VT101	-0.0142569	-0.00684265	-0.00158968
HS875	-0.0142893	-0.00678029	-0.00141608
TN503	-0.0142893	-0.00678029	-0.00141608
norepi_min_(0.1,1.0]_b3_t3	-0.0131992	-0.00650562	-0.00175338
urine_out_total_(0.0,75.0]_b1_t3	-0.0659425	-0.00629981	0.0565589
pf_std_(14.35714,206.25]_b2_t2	-0.0382232	-0.00621461	0.026931
pf_iqr_(14.35714,292.071425]_b2_t2	-0.0382232	-0.00621461	0.026931
gcs_verbal_min_(2.0,5.0]_b2_t2	-0.0466754	-0.00621385	0.0296743
CV900	-0.0117457	-0.00617617	-0.00193345
Na_flag_h	-0.0235866	-0.0060995	0.0137367
RS300	-0.0548491	-0.00604584	0.0518588
norepi_median_(0.050000001,0.0970000002]_b2_t5	-0.0124128	-0.00600772	-0.00127844
lipase_flag_ll	-0.0129358	-0.00600029	-0.00107164
AM118	-0.0115713	-0.00595563	-0.00165586
Vtset_std_(0.0,63.2455532034]_b1_t1	-0.039181	-0.00591671	0.0255552
Vtset_iqr_(0.0,100.0]_b1_t1	-0.039181	-0.00591671	0.0255552
CV701	-0.0113204	-0.00579203	-0.00176543
CV050	-0.0126771	-0.00573014	-0.00130502
AD400	-0.0129848	-0.00567986	-0.00108113
Plat_max_(0.0,14.0]_b1_t5	-0.0286695	-0.00561457	0.0169917
mAirP_missing	-0.0358848	-0.00559812	0.0281589
pf_calc_std_(12.5,25.9320693779]_b2_t4	-0.0883151	-0.00551418	0.0677745
Vtobs_max_(626.2,2000.0]_b5_t5	-0.0421952	-0.00548896	0.0261516
iv_in_mean_(19.6480001333,100.0]_b2_t4	-0.0602377	-0.00536798	0.0505133
AM119	-0.0122586	-0.00526316	-0.000904627
Plat_min_(14.0,15.0]_b2_t5	-0.0219586	-0.0051465	0.0165033
AM250	-0.0101874	-0.00514022	-0.00142577
DE200	-0.0724797	-0.00512665	0.0592155
mAirP_median_(12.0,26.0]_b5_t5	-0.0310381	-0.0051227	0.0133997
norepi_mean_(0.0556727267345,0.1]_b2_t5	-0.0151082	-0.00496902	0.00786643
CN500	-0.00922978	-0.00493982	-0.0020851
Hgb_flag_ll	-0.0114673	-0.00488533	-0.000533456
PEEP_min_(5.0,15.0]_b2_t2	-0.0421329	-0.00486354	0.0222284
AM700	-0.0350692	-0.00482566	0.018786
pH_flag_hh	-0.0110697	-0.00482497	-0.000710851
epi_min_(0.0,0.04]_b1_t2	-0.0120257	-0.00475696	0
sp02_max_(98.0,99.0]_b3_t4	-0.0705711	-0.00473278	0.058973
CN550	-0.00826246	-0.00460584	-0.00176532
CN301	-0.00921505	-0.00455214	-0.00143887
RE507	-0.0107473	-0.00455143	-0.000342512
epi_max_(0.1,0.220000004]_b1_t3	-0.011138	-0.00450152	0
CV709	-0.00953081	-0.00449711	-0.00082141
BL116	-0.0100362	-0.00439337	-0.000656072
HS851	-0.036828	-0.00437616	0.0241275
fi02_mean_(31.0,35.5]_b2_t5	-0.0836441	-0.00428889	0.0687456
Tbili_count_(1.0,2.0]_b2_t2	-0.0319093	-0.00428118	0.0253524
urine_out_iqr_(124.0,1900.0]_b3_t3	-0.0615797	-0.00427728	0.0531104
phenyl_std_(0.0,4.0]_b1_t2	-0.00949572	-0.00407089	-0.000569671
phenyl_iqr_(0.0,4.0]_b1_t2	-0.00949572	-0.00407089	-0.000569671
fi02_mean_(21.0,31.0]_b1_t5	-0.069825	-0.00400228	0.0556792
vasso_max_(0.055999999,50.0]_b2_t2	-0.0105878	-0.00396986	0
vasso_mean_(0.0445714275714,37.5099999998]_b3_t3	-0.0105878	-0.00396986	0
Plat_min_(17.8,21.0]_b4_t5	-0.0313856	-0.00396197	0.0222382
lactate_flag_l	-0.00905079	-0.00386542	-0.000673152
Na_flag_ll	-0.00916973	-0.00384072	0
rass_min_(-5.0,-3.0]_b1_t4	-0.0370787	-0.00381337	0.0276992
Plat_max_(22.0,37.0]_b5_t5	-0.0347802	-0.00367447	0.0231184
PEEP_mean_(5.0,7.76176470588]_b2_t3	-0.0205174	-0.00340755	0.0176751
epi_min_(0.04,0.1]_b2_t2	-0.00875947	-0.00327595	0
epi_mean_(0.09,0.1]_b2_t5	-0.00875947	-0.00327595	0
epi_median_(0.09,0.1]_b2_t5	-0.00875947	-0.00327595	0
epi_std_(0.0,0.03]_b1_t4	-0.00875947	-0.00327595	0
epi_iqr_(0.0,0.03]_b1_t4	-0.00875947	-0.00327595	0
CV805	-0.00705022	-0.00320606	-0.000811331
iv_in_max_(278.0,700.0]_b3_t4	-0.0650855	-0.00302305	0.0521582
dopa_min_(0.0,1.5]_b1_t4	-0.00864635	-0.00291468	0
Na_flag_hh	-0.00845989	-0.00290204	0
lactate_count_(1.0,2.0]_b2_t3	-0.00614652	-0.00287677	-0.00073005
HS900	-0.00701337	-0.00287005	-0.000346374
hr_missing	-0.00609931	-0.00275954	-0.000411017
GU100	-0.00649481	-0.0027189	-0.000728244
OP700	-0.0544523	-0.00268153	0.031996
Plat_iqr_(0.5,17.35]_b2_t2	-0.0297345	-0.00266728	0.0220023
racename_American Indian or Alaska Native	-0.00528037	-0.00254477	-0.000728195
pf_max_(49.473682,156.9624]_b1_t5	-0.0442282	-0.00252274	0.0335692
vasso_median_(0.039999999,50.0]_b2_t2	-0.00737449	-0.00243215	0
dopa_max_(9.0,10.0]_b3_t5	-0.00723379	-0.00233557	0
urine_out_mean_(200.0,1825.0]_b4_t4	-0.0588889	-0.00227647	0.0431045
sbp_min_(135.0,215.0]_b5_t5	-0.0768764	-0.00227047	0.0601279
Plat_mean_(18.4,22.0]_b4_t5	-0.0294432	-0.00220114	0.0228452
dopa_mean_(6.605849955,6.99799996]_b3_t5	-0.0070609	-0.00213623	0
dopa_median_(8.49599992,9.99199984]_b4_t5	-0.0070609	-0.00213623	0
dopa_std_(4.57008514106,4.71168990689]_b4_t4	-0.0070609	-0.00213623	0
dopa_iqr_(2.00029997,5.143950015]_b3_t4	-0.0070609	-0.00213623	0
Vtset_max_(500.0,650.0]_b4_t4	-0.0248494	-0.00205511	0.0192881
sbp_min_(94.0,109.0]_b2_t5	-0.085055	-0.00202765	0.0717001
dbp_iqr_(4.5,7.0]_b3_t5	-0.08541	-0.00197252	0.0750251
phenyl_max_(58.0,250.0]_b5_t5	-0.0065462	-0.00192526	0
phenyl_mean_(54.0,250.0]_b5_t5	-0.0065462	-0.00192526	0
phenyl_median_(54.0,250.0]_b5_t5	-0.0065462	-0.00192526	0
sp02_missing	-0.00422123	-0.0019226	-0.000372765
epi_max_(0.220000004,0.580000008]_b2_t3	-0.00642954	-0.00189368	0
epi_mean_(0.146666667556,0.311568630523]_b4_t5	-0.00642954	-0.00189368	0
epi_median_(0.14,0.280000004]_b4_t5	-0.00642954	-0.00189368	0
epi_std_(0.0771404523305,0.16063426274]_b3_t4	-0.00642954	-0.00189368	0
epi_iqr_(0.09,0.159999998]_b3_t4	-0.00642954	-0.00189368	0
epi_max_(0.580000008,1.3]_b3_t3	-0.00664679	-0.00187854	0
epi_mean_(0.311568630523,0.691176477059]_b5_t5	-0.00664679	-0.00187854	0
epi_median_(0.280000004,0.60000002]_b5_t5	-0.00664679	-0.00187854	0
epi_std_(0.16063426274,0.331766790393]_b4_t4	-0.00664679	-0.00187854	0
epi_iqr_(0.159999998,0.19999999]_b4_t4	-0.00664679	-0.00187854	0
mAirP_mean_(7.855,8.6]_b2_t5	-0.032069	-0.00187154	0.0274222
gcs_motor_min_(5.0,6.0]_b2_t2	-0.0445264	-0.00183583	0.0345402
phenyl_min_(50.0,250.0]_b5_t5	-0.00636498	-0.00176367	0
dobu_min_(0.0,0.99960004]_b1_t5	-0.00546406	-0.00165659	0
dobu_max_(600002.0,1000000.0]_b5_t5	-0.00546406	-0.00165659	0
dobu_mean_(120003.32,200002.2]_b5_t5	-0.00546406	-0.00165659	0
dobu_median_(1.0,1.59960004]_b1_t5	-0.00546406	-0.00165659	0
dobu_std_(239999.340199,399998.900018]_b5_t5	-0.00546406	-0.00165659	0
dobu_iqr_(6.00019998,10.0]_b5_t5	-0.00546406	-0.00165659	0
phenyl_min_(0.0,13.0]_b1_t5	-0.00458408	-0.00160569	0
phenyl_mean_(10.0,22.6]_b1_t5	-0.00458408	-0.00160569	0
phenyl_median_(10.0,21.0]_b1_t5	-0.00458408	-0.00160569	0
PEEP_mean_(7.76176470588,17.5]_b3_t3	-0.044347	-0.0015829	0.0394607
pH_count_(0.0,1.0]_b1_t3	-0.0465449	-0.00155378	0.0456643
pH_count_(2.0,8.0]_b3_t3	-0.0465449	-0.00155378	0.0456643
dopa_std_(0.0,0.000282814428203]_b1_t4	-0.00473547	-0.00153833	0
dopa_iqr_(0.0,0.00029997]_b1_t4	-0.00473547	-0.00153833	0
PTT_flag_hh	-0.0323207	-0.00150058	0.0226867
pO2_flag_ll	-0.0299348	-0.00148945	0.021928
sbp_iqr_(19.0,104.0]_b5_t5	-0.0705073	-0.00145015	0.0615728
Alb_flag_missing	-0.00506869	-0.00142883	0
dopa_min_(4.5,8.0]_b3_t4	-0.00468346	-0.00136462	0
dopa_max_(6.50019998,9.0]_b2_t5	-0.00468346	-0.00136462	0
dopa_mean_(6.99799996,8.0]_b4_t5	-0.00468346	-0.00136462	0
dopa_median_(6.5,8.49599992]_b3_t5	-0.00468346	-0.00136462	0
fi02_mean_(52.0,100.0]_b5_t5	-0.0560697	-0.00129534	0.0553906
RRobs_std_(3.06317103732,14.9916643506]_b3_t3	-0.0393724	-0.00127045	0.0364686
RE400	-0.00484915	-0.00126955	0
epi_mean_(0.05,0.09]_b1_t5	-0.00407395	-0.00126061	0
epi_median_(0.05,0.09]_b1_t5	-0.00407395	-0.00126061	0
epi_std_(0.03,0.0771404523305]_b2_t4	-0.00407395	-0.00126061	0
epi_iqr_(0.03,0.09]_b2_t4	-0.00407395	-0.00126061	0
phenyl_max_(44.0,50.0]_b3_t5	-0.00357745	-0.00122689	0
BL115	-0.00344146	-0.00121291	0
phenyl_max_(10.0,28.0]_b1_t5	-0.00382954	-0.0011951	0
Hgb_flag_missing	-0.00445315	-0.00110888	0
dopa_min_(1.5,4.5]_b2_t4	-0.00423695	-0.00110868	0
dopa_max_(2.5009999,6.50019998]_b1_t5	-0.00423695	-0.00110868	0
dopa_mean_(2.5006666,5.71583331]_b1_t5	-0.00423695	-0.00110868	0
dopa_median_(2.5009999,4.50019998]_b1_t5	-0.00423695	-0.00110868	0
dopa_std_(0.000282814428203,1.81415639427]_b2_t4	-0.00423695	-0.00110868	0
dopa_iqr_(0.00029997,2.00029997]_b2_t4	-0.00423695	-0.00110868	0
dbp_median_(78.0,122.0]_b5_t5	-0.0701412	-0.00103399	0.0632303
Vtobs_max_(523.4,626.2]_b4_t5	-0.044	-0.00100127	0.0367301
phenyl_std_(4.0,16.3095064303]_b2_t2	-0.00317908	-0.000966428	0
phenyl_iqr_(4.0,10.0]_b2_t2	-0.00317908	-0.000966428	0
vasso_min_(0.039999999,0.06666667]_b2_t2	-0.00402461	-0.000914093	0
dopa_max_(11.0,15.0]_b5_t5	-0.00402461	-0.000914093	0
dopa_mean_(5.71583331,6.605849955]_b2_t5	-0.00402461	-0.000914093	0
dopa_median_(4.50019998,6.5]_b2_t5	-0.00402461	-0.000914093	0
dopa_std_(1.81415639427,4.57008514106]_b3_t4	-0.00402461	-0.000914093	0
dopa_iqr_(5.143950015,5.719750075]_b4_t4	-0.00402461	-0.000914093	0
HS503	-0.00304002	-0.000824301	0
Plt_flag_l	-0.00319672	-0.000806521	0
PEEP_missing	-0.0329818	-0.000787973	0.0336658
pf_mean_(49.473682,155.454548]_b1_t5	-0.0427425	-0.000780261	0.0359653
pf_median_(49.473682,155.393944]_b1_t5	-0.0427425	-0.000780261	0.0359653
Plat_std_(0.5,14.2094647643]_b2_t2	-0.0276919	-0.000775108	0.02425
dobu_min_(1.99920008,2.99920008]_b3_t5	-0.00274108	-0.000760091	0
dobu_max_(2.5,3.5]_b1_t5	-0.00274108	-0.000760091	0
dobu_mean_(2.4993334,3.49960004]_b1_t5	-0.00274108	-0.000760091	0
dobu_median_(2.19920008,2.99920008]_b3_t5	-0.00274108	-0.000760091	0
dobu_std_(0.000377085904271,79999.7803806]_b3_t5	-0.00274108	-0.000760091	0
dobu_iqr_(0.00039996,2.00039996]_b3_t5	-0.00274108	-0.000760091	0
Vtset_mean_(500.0,650.0]_b4_t4	-0.0231107	-0.000699448	0.0200777
dobu_min_(3.99960004,5.0]_b5_t5	-0.00273693	-0.000628795	0
dobu_max_(4.5,200004.0]_b3_t5	-0.00273693	-0.000628795	0
dobu_mean_(4.49986668,40004.44]_b3_t5	-0.00273693	-0.000628795	0
dobu_median_(3.99960004,5.0]_b5_t5	-0.00273693	-0.000628795	0
dobu_std_(0.0,0.000188542952136]_b1_t5	-0.00273693	-0.000628795	0
dobu_iqr_(0.0,0.00019998]_b1_t5	-0.00273693	-0.000628795	0
Plat_median_(18.0,22.0]_b4_t5	-0.0285634	-0.000603336	0.0238386
phenyl_min_(46.0,50.0]_b4_t5	-0.00221835	-0.000595294	0
gcs_verbal_median_(1.0,4.0]_b1_t2	-0.0568966	-0.000590792	0.0527882
phenyl_min_(31.0,46.0]_b3_t5	-0.00232756	-0.000554893	0
phenyl_max_(28.0,44.0]_b2_t5	-0.00232756	-0.000554893	0
phenyl_mean_(31.0,46.0]_b3_t5	-0.00232756	-0.000554893	0
phenyl_median_(31.0,46.0]_b3_t5	-0.00232756	-0.000554893	0
mAirP_min_(7.5,8.2]_b2_t5	-0.0327813	-0.000550273	0.0282092
temp_median_(98.1,98.35]_b3_t5	-0.0737041	-0.000513372	0.0732159
RRobs_median_(16.0,20.0]_b3_t5	-0.0471289	-0.000444452	0.0401709
phenyl_mean_(46.0,54.0]_b4_t5	-0.00201509	-0.000429977	0
phenyl_median_(46.0,54.0]_b4_t5	-0.00201509	-0.000429977	0
phenyl_min_(13.0,31.0]_b2_t5	-0.00186277	-0.000372991	0
phenyl_mean_(22.6,31.0]_b2_t5	-0.00186277	-0.000372991	0
phenyl_median_(21.0,31.0]_b2_t5	-0.00186277	-0.000372991	0
norepi_max_(0.1,0.1198]_b2_t5	-0.00178337	-0.000353131	0
mAirP_max_(11.0,14.0]_b4_t5	-0.0280928	-0.000316146	0.0198375
dbp_iqr_(2.0,4.5]_b2_t5	-0.0726984	-0.000265615	0.0755806
dopa_min_(8.0,10.0]_b4_t4	-0.00086676	-0.000159974	0
dopa_mean_(8.0,10.0]_b5_t5	-0.00086676	-0.000159974	0
dopa_median_(9.99199984,10.0]_b5_t5	-0.00086676	-0.000159974	0
AM500	-0.000525149	-0.000119534	0
lactate_flag_ll	0	0	0
pO2_flag_hh	0	0	0
K_flag_ll	0	0	0
HCO2_flag_ll	0	0	0
HCO2_flag_hh	0	0	0
BUN_flag_ll	0	0	0
BUN_flag_hh	0	0	0
Cr_flag_ll	0	0	0
Cr_flag_hh	0	0	0
Hgb_flag_l	0	0	0
Plt_flag_missing	0	0	0
TP_flag_l	0	0	0
TP_flag_missing	0	0	0
Tbili_flag_l	0	0	0
Tbili_flag_missing	0	0	0
Alb_flag_ll	0	0	0
Alb_flag_n	0	0	0
AST_flag_ll	0	0	0
AST_flag_n	0	0	0
AST_flag_h	0	0	0
INR_flag_ll	0	0	0
INR_flag_n	0	0	0
INR_flag_h	0	0	0
INR_flag_missing	0	0	0
lipase_flag_n	0	0	0
lipase_flag_h	0	0	0
lipase_flag_hh	0	0	0
trop_flag_l	0	0	0
trop_flag_h	0	0	0
trop_flag_hh	0	0	0
BNP_flag_l	0	0	0
BNP_flag_h	0	0	0
BNP_flag_hh	0	0	0
PTT_flag_l	0	0	0
PTT_flag_h	0	0	0
Plt_count_(1.0,3.0]_b2_t2	0	0	0
TN501	0	0	0
dialysis	0	0	0
Plt_flag_hh	-0.0405295	1.22203e-05	0.0474473
CV250	-0.0352198	8.74532e-05	0.0373391
RRobs_min_(14.0,18.0]_b2_t4	-0.0471486	0.00024201	0.0400537
gcs_verbal_missing	-0.0293004	0.000304104	0.0288517
fi02_mean_(35.5,40.4]_b3_t5	-0.080428	0.00031037	0.073115
fi02_max_(40.0,52.0]_b3_t5	-0.0858425	0.000336807	0.0796254
Vtobs_min_(491.2,1168.0]_b5_t5	-0.0423938	0.000454334	0.0358665
rr_std_(0.0,1.0]_b1_t4	-0.0707295	0.000508575	0.0608206
norepi_std_(0.0343786368416,0.0604305083277]_b2_t4	-0.0165842	0.000546353	0.0218944
BUN_flag_l	-0.0290441	0.000834149	0.0331454
ageinyears_(74.0,90.900002]_b5_t5	-0.0924484	0.000841709	0.0864903
dbp_min_(71.0,104.0]_b5_t5	-0.0689677	0.000963108	0.0652749
pf_max_(418.8,600.0]_b5_t5	-0.0415701	0.00108819	0.0430349
RRobs_iqr_(0.0,0.5]_b1_t3	-0.0548428	0.00112415	0.0564595
WBC_flag_ll	-0.0202007	0.00143021	0.0244416
rr_max_(18.0,20.0]_b2_t5	-0.0758205	0.00143709	0.0830169
Vtobs_mean_(528.756666667,1168.0]_b5_t5	-0.0408532	0.00148275	0.0361745
HS702	-0.0204393	0.00178068	0.0208104
norepi_iqr_(0.1108000036,1.0]_b4_t4	-0.0158178	0.00182071	0.021984
Vtset_median_(500.0,650.0]_b4_t4	-0.0204251	0.00182986	0.0220204
TN430	-0.0498619	0.00198261	0.0502696
Vtobs_median_(527.4,1168.0]_b5_t5	-0.0394068	0.0020568	0.0370435
rass_median_(-5.0,-3.0]_b1_t4	-0.0314345	0.00207071	0.0331187
temp_std_(0.2,0.45]_b2_t3	-0.0674757	0.00209794	0.0647167
norepi_min_(0.0,0.0480000006]_b1_t3	-0.0240255	0.00220369	0.0217572
PTT_count_(1.0,2.0]_b2_t2	-0.0269134	0.00228429	0.0249324
RRobs_mean_(16.4666666667,19.8892156863]_b3_t5	-0.0426686	0.00239388	0.0433567
BUN_flag_h	-0.073921	0.00240185	0.0773303
dbp_mean_(65.0,70.8]_b3_t5	-0.0771112	0.00247035	0.0726656
norepi_max_(0.1198,0.260000002]_b3_t5	-0.0146226	0.00262233	0.0211105
Plat_missing	-0.0388244	0.00270928	0.0392266
CV200	-0.0319389	0.00314745	0.037364
mAirP_median_(7.9,8.6]_b2_t5	-0.0259845	0.00322726	0.032563
GA301	-0.0345915	0.00341521	0.0419038
DE102	-0.0262551	0.00344228	0.0256361
pCO2_flag_n	-0.0545033	0.00346812	0.0565458
Vtobs_missing	-0.0289811	0.00371657	0.0396015
pf_mean_(397.083338,600.0]_b5_t5	-0.0389226	0.00390655	0.0428926
BNP_flag_ll	-0.0481289	0.00394576	0.0588917
gcs_motor_missing	-0.0248226	0.00400108	0.0329182
gcs_eye_missing	-0.0248226	0.00400108	0.0329182
Vtset_min_(500.0,650.0]_b4_t4	-0.0179638	0.00416434	0.0239081
pCO2_flag_hh	-0.0245386	0.00438232	0.0250288
norepi_median_(0.121000001,0.2]_b4_t5	-0.0185789	0.00440924	0.0227593
vasso_min_(0.0,0.039999999]_b1_t2	-0.0173996	0.004418	0.0231451
MS102	-0.0316156	0.0044336	0.0350332
AD900	-0.0194562	0.00445114	0.0232427
pf_median_(396.22024,600.0]_b5_t5	-0.0388951	0.00451916	0.0428735
rbc_transf_min_(0.0,350.0]_b1_t1	-0.0153353	0.00454197	0.028112
rbc_transf_max_(0.0,1000.0]_b1_t1	-0.0153353	0.00454197	0.028112
rbc_transf_mean_(0.0,350.0]_b1_t1	-0.0153353	0.00454197	0.028112
rbc_transf_median_(0.0,350.0]_b1_t1	-0.0153353	0.00454197	0.028112
rbc_transf_std_(0.0,329.983164554]_b1_t1	-0.0153353	0.00454197	0.028112
rbc_transf_iqr_(0.0,350.0]_b1_t1	-0.0153353	0.00454197	0.028112
ffp_transf_min_(0.0,233.0]_b1_t1	-0.0153353	0.00454197	0.028112
ffp_transf_max_(0.0,350.0]_b1_t1	-0.0153353	0.00454197	0.028112
ffp_transf_mean_(0.0,233.0]_b1_t1	-0.0153353	0.00454197	0.028112
ffp_transf_median_(0.0,233.0]_b1_t1	-0.0153353	0.00454197	0.028112
ffp_transf_std_(0.0,161.071412734]_b1_t1	-0.0153353	0.00454197	0.028112
ffp_transf_iqr_(0.0,318.0]_b1_t1	-0.0153353	0.00454197	0.028112
iv_in_median_(0.0,25.0]_b1_t3	-0.0634321	0.00459264	0.0688433
gcs_motor_mean_(5.38666666667,6.0]_b2_t2	-0.03594	0.00472573	0.0403713
OP900	-0.0410725	0.00478397	0.0413399
mAirP_iqr_(0.315,1.4]_b2_t3	-0.0273667	0.00494588	0.0331788
norepi_mean_(0.1,0.1416666689]_b3_t5	-0.0118783	0.0049885	0.0232667
CN601	-0.0086497	0.00520484	0.0221954
RRset_min_(4.0,12.0]_b1_t4	-0.0393564	0.00527468	0.0419626
Vtobs_max_(473.0,523.4]_b3_t5	-0.0395065	0.00538666	0.0336292
Vtobs_median_(391.0,446.6]_b2_t5	-0.0345657	0.00563387	0.0401761
trop_flag_ll	-0.0242321	0.00582169	0.0363543
sp02_median_(93.5,95.0]_b2_t5	-0.0726168	0.00585297	0.0752337
pf_min_(386.315786,600.0]_b5_t5	-0.0383441	0.00598589	0.0451569
RRset_median_(4.0,14.0]_b1_t4	-0.03815	0.00611835	0.0412551
norepi_mean_(0.1416666689,0.2000000012]_b4_t5	-0.0157902	0.00616468	0.0237805
vasso_median_(0.0199999995,0.039999999]_b1_t2	-0.0152991	0.00617628	0.0246928
RE200	-0.0224423	0.00625331	0.0244747
temp_min_(98.6,102.9]_b5_t5	-0.0641023	0.00628527	0.0687628
norepi_std_(0.0604305083277,0.108430917258]_b3_t4	-0.0154078	0.00628693	0.0254787
pf_min_(44.210526,131.060608]_b1_t5	-0.0384152	0.00633905	0.04678
urine_out_median_(200.0,2000.0]_b3_t3	-0.0501478	0.00676991	0.052945
NT100	-0.0215502	0.00680114	0.0249544
RS201	-0.0215502	0.00680114	0.0249544
norepi_max_(0.260000002,0.40000001]_b4_t5	-0.0155979	0.00699225	0.0258577
RRobs_max_(6.0,16.0]_b1_t5	-0.0375093	0.00714919	0.0429567
mAirP_std_(0.5,1.40053558623]_b2_t3	-0.0245355	0.00716495	0.0344876
Vtobs_mean_(386.6,443.542857143]_b2_t5	-0.0328604	0.00722888	0.0428998
temp_median_(98.8,103.55]_b5_t5	-0.0613621	0.00727972	0.0659806
AM350	-0.0251632	0.0077511	0.0391489
dbp_std_(0.0,2.05703790891]_b1_t5	-0.057704	0.00781915	0.0713018
norepi_max_(0.02,0.1]_b1_t5	-0.019681	0.00785859	0.0298618
rass_mean_(-5.0,-3.0]_b1_t4	-0.0267632	0.00786943	0.037923
vasso_max_(0.039999999,0.055999999]_b1_t2	-0.0138167	0.00789673	0.0257674
vasso_mean_(0.0199999995,0.039999999]_b1_t3	-0.0138167	0.00789673	0.0257674
norepi_median_(0.0970000002,0.121000001]_b3_t5	-0.0109639	0.00796176	0.0310118
fi02_median_(28.0,36.0]_b2_t5	-0.0743585	0.0081582	0.0832245
temp_std_(0.45,3.58]_b3_t3	-0.0718181	0.00818971	0.0746368
temp_median_(98.35,98.8]_b4_t5	-0.056923	0.0082075	0.0635582
RE101	-0.0515006	0.00872973	0.0596618
AM400	-0.0342103	0.00875364	0.049671
RRobs_missing	-0.0250806	0.0090249	0.0434459
fi02_std_(17.7270979012,39.5]_b4_t4	-0.0523442	0.00906238	0.0733953
norepi_min_(0.0480000006,0.1]_b2_t3	-0.0213112	0.00916464	0.0395851
DE752	-0.03856	0.00918091	0.057995
BUN_flag_missing	-0.03482	0.00964114	0.0474691
rr_max_(22.0,29.0]_b4_t5	-0.0843321	0.00971523	0.095211
trop_count_(1.0,3.0]_b2_t2	-0.0164756	0.00975614	0.0363774
rass_max_(-5.0,-3.0]_b1_t4	-0.0244106	0.0098	0.0389923
RRset_max_(16.0,20.0]_b3_t4	-0.0350832	0.0100481	0.0446849
rr_median_(18.0,19.0]_b3_t5	-0.0487931	0.0101951	0.0555482
norepi_std_(0.0,0.0343786368416]_b1_t4	-0.0182784	0.0105384	0.0322439
lactate_flag_hh	-0.0232765	0.0106298	0.043534
mAirP_min_(8.2,9.06]_b3_t5	-0.0271041	0.0110069	0.0469825
TN476	-0.0341994	0.0111526	0.0514718
lactate_count_(2.0,8.0]_b3_t3	-0.0181356	0.0111752	0.0382933
NT200	-0.0489247	0.0112291	0.0614095
iv_in_mean_(281.623508,2004.17]_b4_t4	-0.0499191	0.0112697	0.0682803
norepi_median_(0.0,0.050000001]_b1_t5	-0.0167684	0.0112938	0.0283838
Cr_flag_missing	-0.0336737	0.0113254	0.0496894
pf_calc_max_(46.0,188.0]_b1_t5	-0.0551365	0.011389	0.0725301
sp02_median_(95.0,97.0]_b3_t5	-0.0693274	0.0114785	0.089683
Vtset_max_(450.0,500.0]_b3_t4	-0.0391909	0.0115271	0.0534542
Vtset_median_(400.0,450.0]_b2_t4	-0.0314771	0.0120526	0.0471697
mAirP_mean_(10.0,12.0]_b4_t5	-0.0267404	0.0120674	0.0513622
rr_std_(2.16624137482,4.0996707438]_b3_t4	-0.0756586	0.0121383	0.0911251
urine_out_median_(0.0,1.0]_b1_t3	-0.0616882	0.0123179	0.0853641
RRset_mean_(8.0,14.0]_b1_t4	-0.0329498	0.0125163	0.0481947
lipase_flag_missing	-0.0354448	0.0127081	0.0615237
sbp_std_(3.74165738677,7.31816613337]_b2_t5	-0.0740407	0.0127633	0.096444
Vtset_mean_(400.0,450.0]_b2_t4	-0.0306259	0.012897	0.0473414
Na_flag_missing	-0.0329446	0.0129653	0.0503225
temp_std_(0.0,0.2]_b1_t3	-0.0572433	0.0129796	0.0862049
hr_std_(0.0,2.05480466766]_b1_t5	-0.0734491	0.0129854	0.0817134
norepi_mean_(0.0149999999,0.0556727267345]_b1_t5	-0.0148075	0.0132124	0.0302347
AH102	-0.0198502	0.0133471	0.0423355
gcs_verbal_max_(1.0,4.0]_b1_t2	-0.0429455	0.0135468	0.067537
Vtset_mean_(450.0,500.0]_b3_t4	-0.0368664	0.0136034	0.0567077
vasso_std_(0.0146070154458,21.633314587]_b2_t2	-0.00567362	0.0139338	0.0311927
vasso_iqr_(0.0179999992,12.4900000002]_b2_t2	-0.00567362	0.0139338	0.0311927
AU350	-0.0135909	0.01429	0.0421798
fi02_median_(40.0,52.0]_b4_t5	-0.0551025	0.0144477	0.0779862
dbp_iqr_(11.5,103.0]_b5_t5	-0.0634138	0.0145875	0.0847252
temp_max_(98.6,99.1]_b4_t5	-0.0581523	0.0146372	0.0843146
RRset_mean_(14.0,16.0]_b2_t4	-0.034343	0.0146578	0.0553086
CN309	-0.0141562	0.0147354	0.0339714
PEEP_max_(8.0,20.0]_b3_t3	-0.0281939	0.0148124	0.0575825
hr_iqr_(12.0,109.0]_b5_t5	-0.0612494	0.0150953	0.0851514
RRset_std_(1.3251402119,9.42809041582]_b2_t2	-0.0280384	0.015107	0.0512317
pCO2_flag_h	-0.045811	0.0153887	0.0678926
Vtobs_median_(446.6,485.0]_b3_t5	-0.0355827	0.0153961	0.0582048
fi02_median_(21.0,28.0]_b1_t5	-0.0471224	0.0154183	0.0807825
CV100	-0.0528505	0.0155398	0.0788694
sedated	-0.0488251	0.01559	0.0761
K_flag_missing	-0.0300105	0.0156534	0.0537727
Plat_median_(16.0,18.0]_b3_t5	-0.024146	0.0156687	0.054842
Vtset_max_(400.0,450.0]_b2_t4	-0.0274729	0.0157058	0.049415
RS100	-0.0449183	0.015803	0.0673978
Plat_mean_(16.0,18.4]_b3_t5	-0.0240387	0.015858	0.0550853
pf_calc_min_(46.0,124.0]_b1_t5	-0.0489843	0.0161258	0.0854015
fi02_iqr_(19.5,79.0]_b4_t4	-0.0477973	0.0162627	0.0817014
Vtset_median_(450.0,500.0]_b3_t4	-0.0338667	0.0162684	0.0579691
pO2_count_(1.0,7.0]_b2_t2	-0.0121756	0.0164837	0.0441005
K_count_(1.0,3.0]_b2_t2	-0.0121756	0.0164837	0.0441005
BUN_count_(1.0,2.0]_b2_t3	-0.0121756	0.0164837	0.0441005
Vtset_min_(450.0,500.0]_b3_t4	-0.0326125	0.0165671	0.0580951
Vtobs_mean_(443.542857143,487.063157895]_b3_t5	-0.0336514	0.0165709	0.0578139
Tbili_flag_n	-0.0127809	0.0166726	0.0321448
Na_count_(1.0,3.0]_b2_t2	-0.0118467	0.0167712	0.0442318
PTT_flag_n	-0.052179	0.0168855	0.0864456
RRobs_mean_(14.0,16.4666666667]_b2_t5	-0.0293091	0.0168953	0.049657
RRset_max_(8.0,14.0]_b1_t4	-0.0288746	0.0169255	0.0521742
DE900	-0.0398364	0.0169323	0.0667935
K_flag_hh	-0.0278024	0.0170986	0.0591549
unresponsive	-0.0224235	0.0171664	0.0467889
fi02_min_(21.0,32.0]_b1_t3	-0.049737	0.0172197	0.0855636
BNP_flag_missing	-0.0479167	0.0173888	0.0764682
temp_mean_(90.6,97.7]_b1_t5	-0.0470459	0.0177421	0.0775786
urine_out_iqr_(15.0,124.0]_b2_t3	-0.0552519	0.0177651	0.0855321
urine_out_total_(400.0,4550.0]_b3_t3	-0.0446987	0.017822	0.0839262
RRset_median_(14.0,16.0]_b2_t4	-0.0316838	0.0178253	0.05776
Vtobs_min_(391.6,444.4]_b3_t5	-0.0284052	0.0179649	0.0558256
hfnc	-0.010129	0.018347	0.0391237
sbp_min_(109.0,121.0]_b3_t5	-0.0630706	0.0183821	0.101535
GU600	-0.0269109	0.0187795	0.0550783
Vtobs_min_(444.4,491.2]_b4_t5	-0.032287	0.018895	0.060015
K_flag_l	-0.0363467	0.0189637	0.0735499
AM111	-0.0387205	0.0194871	0.053791
OP400	-0.0258757	0.0195832	0.0555347
TN101	-0.0258757	0.0195832	0.0555347
TN102	-0.0258757	0.0195832	0.0555347
TN440	-0.0258757	0.0195832	0.0555347
mAirP_min_(9.06,11.0]_b4_t5	-0.0330421	0.0196161	0.065936
pf_calc_iqr_(26.0,52.0]_b3_t4	-0.056577	0.0199055	0.0978862
WBC_flag_hh	-0.00566797	0.0199468	0.0469536
pO2_flag_l	-0.0263903	0.0200313	0.0664487
rass_missing	-0.03067	0.0201264	0.0715949
pf_calc_std_(25.9320693779,48.3208345033]_b3_t4	-0.058584	0.0202834	0.092004
CN102	-0.0157135	0.0203437	0.0563896
Plat_min_(15.0,17.8]_b3_t5	-0.0186682	0.0204203	0.0608925
gcs_eye_max_(3.0,4.0]_b2_t2	-0.016172	0.0206038	0.0565425
RS202	-0.0255482	0.0207833	0.0569125
temp_max_(97.9,98.2]_b2_t5	-0.0590058	0.0210157	0.0886245
gcs_eye_min_(3.0,4.0]_b2_t2	-0.0219806	0.0213234	0.0592031
CN203	-0.0212055	0.0213273	0.0584752
Vtobs_max_(412.8,473.0]_b2_t5	-0.0346788	0.0214036	0.0613435
temp_min_(87.1,97.5]_b1_t5	-0.0648219	0.0214387	0.0996952
dbp_iqr_(0.0,2.0]_b1_t5	-0.0497536	0.0219986	0.0909233
HCO2_count_(1.0,3.0]_b2_t2	-0.00625608	0.0222138	0.050092
hr_median_(91.0,104.0]_b4_t5	-0.0587781	0.022316	0.0984332
rr_min_(16.0,18.0]_b3_t4	-0.0621491	0.022607	0.110043
norepi_iqr_(0.0250000004,0.0535]_b2_t4	-0.0117428	0.0226263	0.0558569
pf_mean_(218.657895,297.6]_b3_t5	-0.0308716	0.0226385	0.0735105
rr_max_(29.0,78.0]_b5_t5	-0.0398415	0.0226824	0.0839349
dbp_mean_(70.8,78.1666666667]_b4_t5	-0.058419	0.02279	0.0986347
GU300	-0.0326036	0.0228493	0.0715929
sbp_max_(122.0,136.0]_b2_t5	-0.0591063	0.0238716	0.10701
Plat_max_(14.0,17.0]_b2_t5	-0.0213755	0.0239458	0.0619106
mAirP_mean_(8.6,10.0]_b3_t5	-0.0252945	0.0247987	0.0641904
PEEP_median_(8.0,20.0]_b3_t3	-0.0190653	0.0248553	0.0686854
racename_African American	-0.0502456	0.0255749	0.0909033
fi02_iqr_(2.0,8.0]_b2_t4	-0.070963	0.0257083	0.114119
RE900	-0.0249656	0.0258006	0.0720683
racename_Native Hawaiian and Other Pacific Islander	-0.00490414	0.0261765	0.0499544
RRset_min_(12.0,14.0]_b2_t4	-0.0245269	0.0261793	0.062499
temp_mean_(98.35,98.8]_b4_t5	-0.0421226	0.0264365	0.0813987
iv_in_max_(700.0,4000.0]_b4_t4	-0.0321921	0.0266142	0.0841444
urine_out_mean_(0.0,25.0]_b1_t4	-0.0350975	0.0266609	0.0860828
iv_in_min_(0.0,5.47799998]_b1_t2	-0.0289467	0.0266984	0.0846146
mAirP_median_(8.6,9.76]_b3_t5	-0.0232587	0.0273284	0.0677363
temp_median_(90.5,97.7]_b1_t5	-0.0431094	0.0279752	0.0929246
iv_in_mean_(100.0,281.623508]_b3_t4	-0.0412041	0.0282974	0.094452
MS400	-0.00804367	0.0283833	0.0674086
VT702	-0.0104256	0.0286362	0.0624295
WBC_flag_l	-0.0136989	0.0290503	0.0728112
pf_max_(309.047612,418.8]_b4_t5	-0.0250581	0.0290668	0.0734421
temp_iqr_(0.2,0.45]_b2_t3	-0.050254	0.02928	0.102541
pCO2_flag_ll	-0.00232276	0.0293969	0.0563163
INR_flag_hh	-0.042767	0.0299352	0.0951593
rass_max_(0.0,4.0]_b4_t4	-0.0207516	0.0301695	0.0718166
sp02_min_(89.0,92.0]_b2_t5	-0.060711	0.0302279	0.118226
pf_median_(218.657895,295.2381]_b3_t5	-0.0218059	0.0304653	0.08109
WBC_flag_h	-0.0548946	0.031537	0.123526
gcs_eye_mean_(3.0,4.0]_b2_t2	-0.00515813	0.031554	0.0678842
Na_flag_l	-0.0363523	0.0315618	0.0952085
pH_flag_ll	-0.0240795	0.0327748	0.0777847
BL500	-0.00563905	0.032968	0.0635042
DX201	-0.00563905	0.032968	0.0635042
lipase_count_(0.0,2.0]_b1_t1	-0.0238725	0.0329805	0.0760993
dbp_median_(64.0,70.5]_b3_t5	-0.0418415	0.0334374	0.113183
sbp_mean_(110.0,122.25]_b2_t5	-0.0571262	0.0335785	0.117615
VT102	-0.00962581	0.0343472	0.0815363
RRobs_mean_(6.0,14.0]_b1_t5	-0.0219348	0.0346944	0.0758674
hr_max_(90.0,101.0]_b3_t5	-0.0484498	0.0348248	0.108795
urine_out_std_(0.0,56.2086838108]_b1_t3	-0.0279571	0.0360406	0.100323
HCO2_flag_missing	-0.0153164	0.0371952	0.0874544
gcs_eye_median_(3.0,4.0]_b2_t2	-0.000158369	0.0376967	0.0734375
hr_std_(2.05480466766,3.90423559171]_b2_t5	-0.0405282	0.0378405	0.11096
iv_in_std_(229.082008,1466.36770286]_b3_t3	-0.0239755	0.0382239	0.097845
RE102	-0.0388416	0.0383527	0.116464
pf_max_(238.928576,309.047612]_b3_t5	-0.0221604	0.038956	0.0906216
rr_mean_(22.5,45.4]_b5_t5	-0.0241768	0.0390295	0.103478
temp_max_(98.2,98.6]_b3_t5	-0.0403849	0.0394543	0.115636
iv_in_max_(50.0,278.0]_b2_t4	-0.0239696	0.0397211	0.0990347
rr_mean_(17.6666666667,19.3743589744]_b3_t5	-0.048383	0.0401229	0.116092
hr_iqr_(2.0,4.0]_b2_t5	-0.0419403	0.0402261	0.109959
rass_mean_(0.0,2.0]_b4_t4	-0.0138428	0.0405692	0.0820774
rass_median_(0.0,2.0]_b4_t4	-0.0138428	0.0405692	0.0820774
rass_min_(0.0,2.0]_b4_t4	-0.0127908	0.0420692	0.0828751
sbp_median_(48.5,109.0]_b1_t5	-0.0223253	0.0425012	0.10652
sp02_mean_(74.0,93.2]_b1_t5	-0.0252091	0.042553	0.106847
pf_median_(295.2381,396.22024]_b4_t5	-0.0195134	0.0426825	0.0877951
rr_max_(20.0,22.0]_b3_t5	-0.0289881	0.0428936	0.106527
RRobs_min_(0.0,14.0]_b1_t4	-0.00448622	0.0429624	0.0819505
pf_calc_iqr_(12.5,26.0]_b2_t4	-0.0414592	0.0430379	0.116167
rr_median_(22.0,50.0]_b5_t5	-0.0239531	0.0430973	0.110148
urine_out_min_(0.0,34.0]_b1_t2	-0.00556568	0.0432774	0.0909711
RRobs_max_(16.0,19.0]_b2_t5	-0.0172661	0.0435426	0.085801
pf_calc_max_(341.0,393.0]_b5_t5	-0.0244707	0.0437292	0.100806
hr_min_(83.0,95.0]_b4_t5	-0.0321865	0.0439312	0.117191
AM900	-0.0315084	0.044015	0.120801
urine_out_max_(250.0,400.0]_b3_t4	-0.0297479	0.0442352	0.107683
sp02_mean_(96.6,98.3333333333]_b4_t5	-0.0380723	0.0447098	0.126173
dbp_max_(64.0,73.0]_b2_t5	-0.0450616	0.0452592	0.130512
sp02_iqr_(3.0,18.0]_b5_t5	-0.0334144	0.045287	0.125755
temp_mean_(98.05,98.35]_b3_t5	-0.0509682	0.0459929	0.124316
fi02_std_(3.91918358845,7.98435971134]_b2_t4	-0.043898	0.0460207	0.12912
hr_max_(116.0,248.0]_b5_t5	-0.0331371	0.0462393	0.124179
RE302	-0.0195296	0.0467427	0.0969816
fi02_max_(36.0,40.0]_b2_t5	-0.0206713	0.0468431	0.114438
dbp_std_(2.05703790891,4.29469957558]_b2_t5	-0.0434459	0.0469577	0.122837
Vtobs_std_(6.51152144312,29.0281664944]_b2_t4	-0.0240666	0.0475795	0.0981062
mAirP_max_(9.14,11.0]_b3_t5	-0.00869145	0.0487292	0.100565
temp_min_(98.1,98.6]_b4_t5	-0.0206533	0.0494143	0.127045
hr_std_(9.71387538524,67.0]_b5_t5	-0.0365428	0.0494812	0.124408
Tbili_flag_hh	-0.0173051	0.0499919	0.115823
temp_iqr_(0.0,0.2]_b1_t3	-0.0225378	0.0500774	0.120287
rr_std_(4.0996707438,18.8785592671]_b4_t4	-0.0122424	0.0505837	0.110883
AST_flag_missing	-0.0196663	0.0507759	0.120172
BNP_flag_n	-0.0277958	0.0508733	0.127551
pf_mean_(297.6,397.083338]_b4_t5	-0.009089	0.0508889	0.0976862
dbp_std_(9.58908844906,50.7034466893]_b5_t5	-0.0334183	0.0517491	0.123713
pf_std_(0.0,14.35714]_b1_t2	-0.00621727	0.0538023	0.108521
pf_iqr_(0.0,14.35714]_b1_t2	-0.00621727	0.0538023	0.108521
urine_out_mean_(25.0,90.0]_b2_t4	-0.0111178	0.0539076	0.117307
Cr_flag_h	-0.0261771	0.0543126	0.125789
location_8D	-0.0274286	0.0550583	0.121889
dbp_max_(73.0,81.0]_b3_t5	-0.0428955	0.0551645	0.142882
DE103	-0.0075975	0.0558314	0.108843
Cr_count_(1.0,3.0]_b2_t2	0.00160872	0.0562489	0.102813
Hgb_count_(1.0,3.0]_b1_t1	0.00160872	0.0562489	0.102813
RRobs_median_(6.0,14.0]_b1_t5	0.000524396	0.0567316	0.0980985
RE103	-0.0199244	0.056761	0.13192
VT105	0.0073187	0.0576895	0.109236
rr_mean_(19.3743589744,22.5]_b4_t5	-0.0173411	0.0581619	0.131117
sbp_min_(0.0,94.0]_b1_t5	-0.00904973	0.0583058	0.118247
ageinyears_(58.0,65.0]_b3_t5	-0.017811	0.0584004	0.141725
TP_count_(0.0,1.0]_b1_t2	0.00469969	0.0588473	0.106206
urine_out_max_(0.0,100.0]_b1_t4	-0.000474629	0.0591395	0.117098
hr_mean_(91.5,104.333333333]_b4_t5	-0.0191942	0.0596347	0.136469
dbp_min_(63.0,71.0]_b4_t5	-0.0295696	0.0612425	0.137491
pf_min_(277.555554,386.315786]_b4_t5	-0.00410186	0.0615246	0.115338
dbp_mean_(32.0,58.5]_b1_t5	-0.0147734	0.0617214	0.132074
sbp_std_(0.0,3.74165738677]_b1_t5	-0.0082443	0.0618702	0.124035
gendercode	-0.0325336	0.062095	0.16147
sbp_median_(109.0,122.0]_b2_t5	-0.0295912	0.0629877	0.142359
Vtobs_iqr_(5.0,19.2]_b2_t4	-0.00157073	0.0657346	0.117591
iv_in_median_(25.0,162.8]_b2_t3	-0.0109282	0.0665237	0.134238
HCO2_flag_l	-0.00671562	0.0698206	0.146866
sp02_std_(2.90593262903,33.2599191554]_b5_t5	-0.0122053	0.0701601	0.145484
pO2_flag_n	0.00810268	0.0707047	0.126913
dbp_min_(0.0,51.0]_b1_t5	-0.00233079	0.0717268	0.137706
lactate_flag_h	-0.010752	0.0722629	0.148787
hr_max_(101.0,116.0]_b4_t5	-0.0258858	0.0735441	0.159154
iv_in_iqr_(187.5,1000.0]_b3_t3	0.00915471	0.0741475	0.134579
sp02_max_(96.0,98.0]_b2_t4	-0.013709	0.074624	0.15548
CN302	-0.00891804	0.0756816	0.152187
RE105	-0.00326545	0.0756907	0.145629
pf_calc_iqr_(52.0,289.0]_b4_t4	-0.00442983	0.0757465	0.146239
rr_median_(19.0,22.0]_b4_t5	-0.0153683	0.0769665	0.156623
ageinyears_(18.0,47.0]_b1_t5	-0.0155152	0.0771671	0.17194
sbp_max_(57.0,122.0]_b1_t5	-0.00595319	0.0774012	0.155426
TP_flag_n	0.00109143	0.078341	0.149043
pf_calc_max_(188.0,229.0]_b2_t5	-0.00464912	0.0811951	0.162906
sp02_iqr_(2.0,3.0]_b4_t5	-0.0118995	0.0812686	0.165386
AM800	0.00535612	0.0812844	0.15156
sp02_median_(69.0,93.5]_b1_t5	0.00320767	0.0814358	0.152429
iv_in_total_(543.33,8804.9100041]_b3_t3	0.0184853	0.0822172	0.145852
sp02_mean_(93.2,95.0]_b2_t5	0.00347982	0.0826934	0.155344
pf_calc_mean_(46.0,163.0]_b1_t5	0.0101326	0.0837398	0.143524
sbp_mean_(48.5,110.0]_b1_t5	0.0126073	0.084348	0.150173
location_ED	0.00530501	0.0847005	0.161594
pf_calc_std_(48.3208345033,169.0]_b4_t4	-0.000946185	0.0850891	0.157537
pf_calc_mean_(163.0,201.333333333]_b2_t5	0.0143775	0.0891096	0.165255
dbp_median_(32.0,58.0]_b1_t5	0.00177159	0.0912072	0.166038
pH_flag_n	0.0132838	0.0994686	0.184062
pf_calc_median_(159.0,199.0]_b2_t5	0.00520864	0.102081	0.194074
rr_min_(18.0,42.0]_b4_t4	0.019638	0.103006	0.178206
rr_iqr_(4.35,29.0]_b4_t4	0.0299997	0.105411	0.178158
pf_calc_median_(46.0,159.0]_b1_t5	0.0245461	0.106619	0.177211
location_Proceduce	0.0263146	0.109843	0.191017
NT900	0.0380567	0.11318	0.19255
sp02_std_(1.94999208609,2.90593262903]_b4_t5	0.0124224	0.114461	0.201061
sbp_iqr_(0.0,4.0]_b1_t5	0.0423919	0.122407	0.199498
Plt_flag_n	0.0433242	0.123585	0.203725
hr_mean_(104.333333333,163.944444444]_b5_t5	0.0450294	0.124114	0.188877
hr_median_(104.0,175.5]_b5_t5	0.054196	0.134031	0.206594
sp02_min_(0.0,89.0]_b1_t5	0.0556152	0.134596	0.209585
Alb_flag_h	0.0737808	0.143919	0.216615
Hgb_flag_n	0.0683271	0.144573	0.211402
hr_min_(95.0,143.0]_b5_t5	0.0636518	0.147932	0.218672
pf_calc_min_(124.0,161.0]_b2_t5	0.0691038	0.154221	0.23757
